# Supplementary material for: Facile formation of a hierarchical TiO2–SnO2 nanocomposite architecture for efficient dye-sensitized solar cells
Source: Royal Society of Chemistry journal article supplement (doi:10.1039/c5ra25772g), 2016-01-01
Supplement: c5ra25772g1.pdf [file c5ra25772g1.pdf]

**Supporting Information**

**Facile Formation of Hierarchical TiO<sub>2</sub>-SnO<sub>2</sub>  
Nanocomposite Architecture for Efficient Dye-  
Sensitized Solar Cells**

*Chiew Keat Lim<sup>\*a,b</sup>, Yadong Wang<sup>a</sup>, Li Zhang<sup>b</sup>*

<sup>a</sup>Biomedical Engineering and Materials Group, School of Engineering, Nanyang Polytechnic,  
180, Ang Mo Kio Avenue 8, Singapore 569830

<sup>b</sup>Temasek Laboratories @ Nanyang Technological University, Singapore 637553

\*Corresponding author: [limc0105@e.ntu.edu.sg](mailto:limc0105@e.ntu.edu.sg)

Table S1. Calculated grain sizes of SnO<sub>2</sub> nanofibers and TiO<sub>2</sub> nanoflakes from XRD pattern based on Scherrer equation.

| Sample                                                                  | Growth Time (hrs) | Grain Size (nm) |
|-------------------------------------------------------------------------|-------------------|-----------------|
| SnO <sub>2</sub> nanofibers                                             | 0                 | 13.9            |
| Hierarchical TiO <sub>2</sub> nanoflakes on SnO <sub>2</sub> nanofibers | 3                 | 14.7            |
|                                                                         | 7                 | 15.3            |
|                                                                         | 15                | 19.5            |
|                                                                         | 24                | 20.6            |

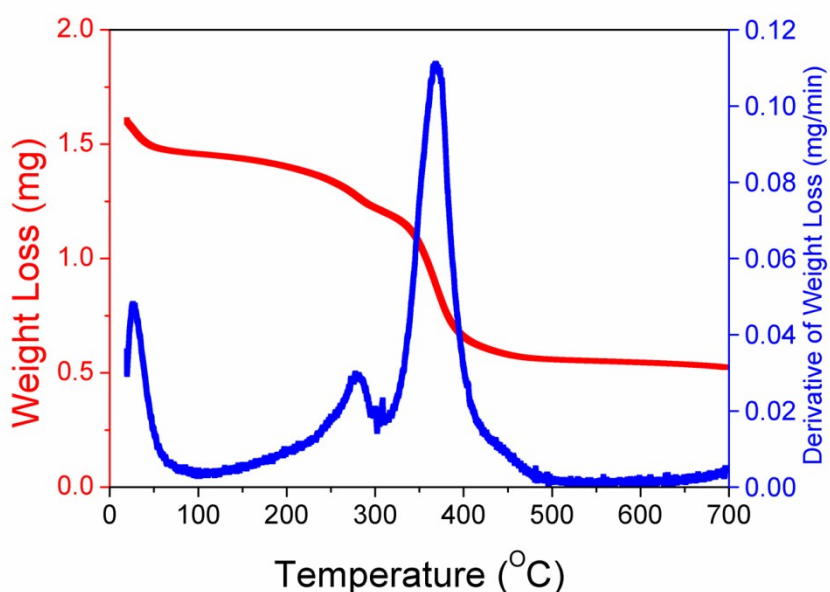

Figure S2. Thermogravimetric analysis (TGA) of electrospun SnO<sub>2</sub> nanofibers. The electrospun SnO<sub>2</sub> nanofibers were subsequently annealed at 500 °C to burn off all the organics compound and achieve good crystallinity.

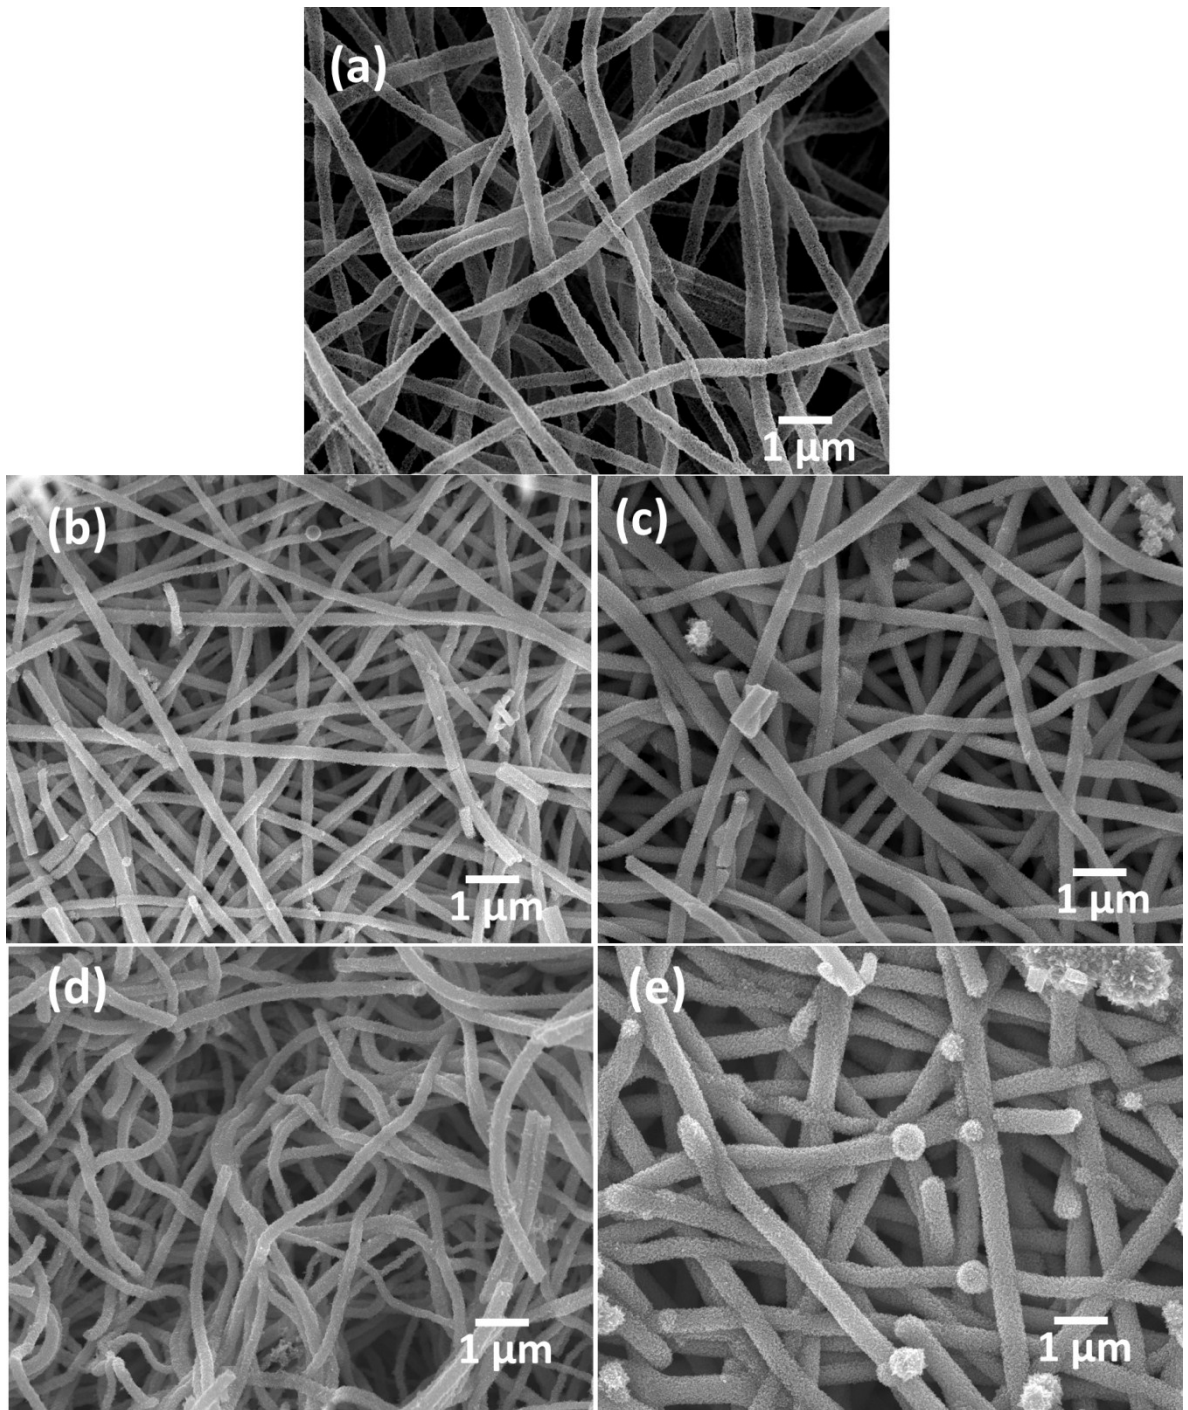

Figure S3. SEM images of hierarchical  $\text{TiO}_2\text{-SnO}_2$  composite nanostructures after hydrothermally grown at different durations: (a) Pristine  $\text{SnO}_2$  nanofibers; (b) 3 hrs; (c) 7 hrs; (d) 15 hrs; (e) 24 hrs. The length of these hierarchical nano-architectures maintain at several tens of micrometers after hydrothermal growth.

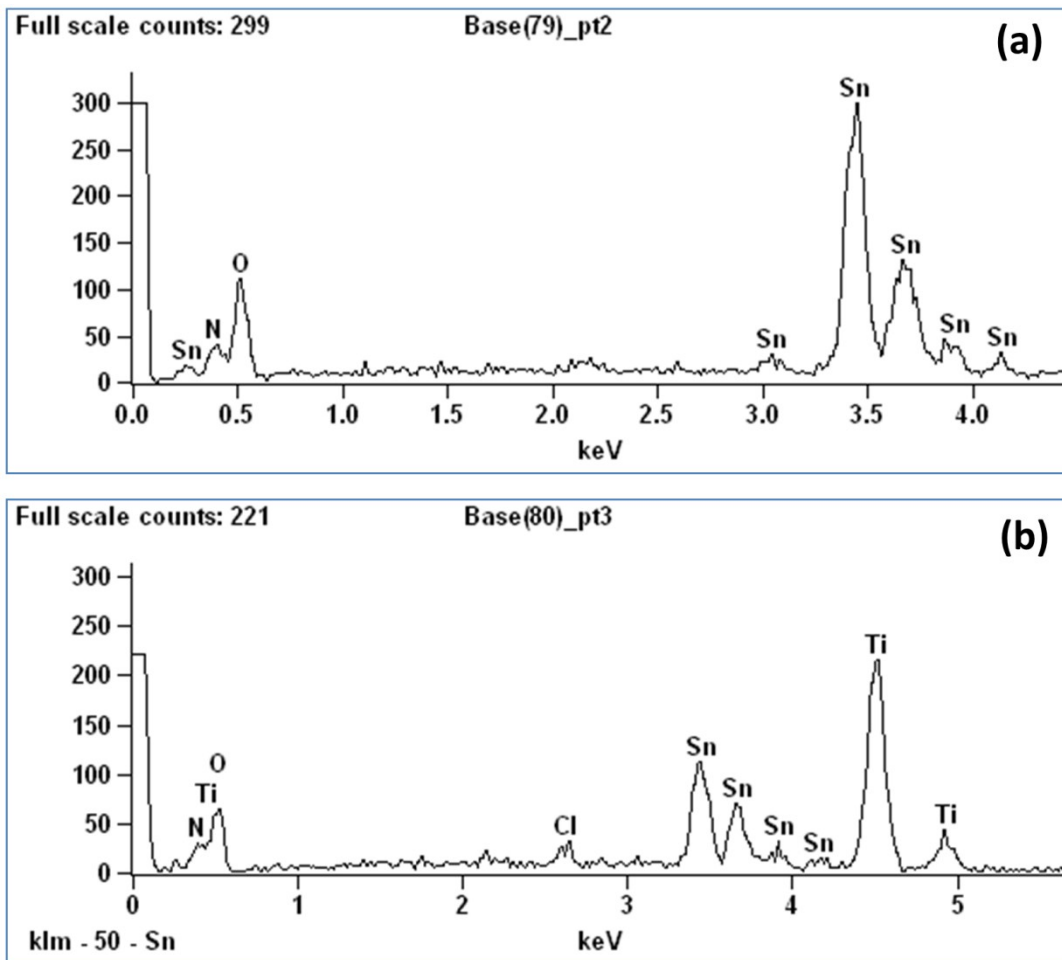

Figure S4. EDX results of (a) pristine SnO<sub>2</sub> nanofibers after annealing; (b) hierarchical TiO<sub>2</sub>-SnO<sub>2</sub> nanostructures. The Ti element presents after the formation of hierarchical TiO<sub>2</sub>-SnO<sub>2</sub> nanostructures

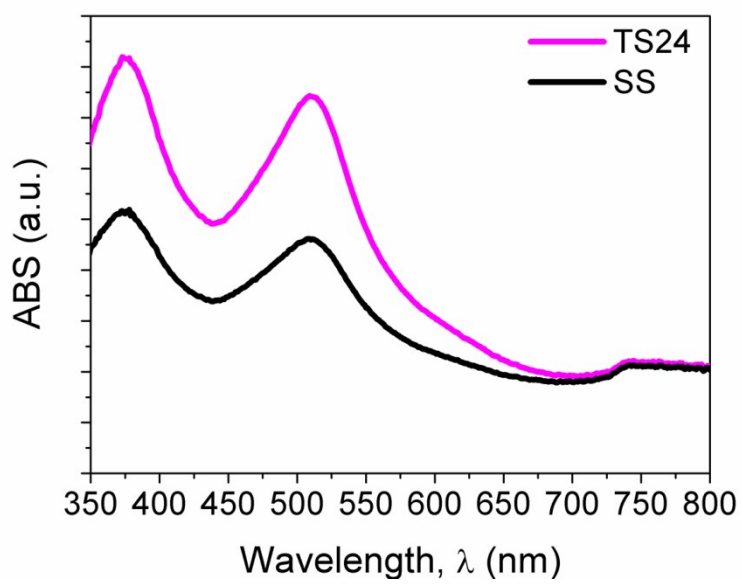

Figure S5. UV-Vis spectra of desorbed dye from the photoelectrode. Higher absorbance for hierarchical  $\text{TiO}_2\text{-SnO}_2$  nanostructures film corresponding to higher dye-loading.
